# Supplementary material
Source: publisher site journal article supplement (https://www.spandidos-publications.com/6868/downloadSupplementary)
Supplement: Supplementary file 1 [file downloadSupplementary]

**Table SI.** Co-expression of HER family members, EGFRvIII, CD44, EpCAM and Ki67 in patients with hepatocellular carcinoma with >5% staining and >10% staining.

| <b>Variables</b>        | <b>No. of patients with &gt;5% staining (%)</b> | <b>No. of patients with &gt;10% staining (%)</b> |
|-------------------------|-------------------------------------------------|--------------------------------------------------|
| wtEGFR + HER-2          | 10 (23)                                         | 7 (16)                                           |
| wtEGFR + HER-4          | 2 (5)                                           | -                                                |
| wtEGFR + EGFRvIII       | 6 (14)                                          | 3 (7)                                            |
| wtEGFR + CD44           | 6 (14)                                          | 3 (7)                                            |
| wtEGFR + EpCAM          | 6 (14)                                          | 4 (9)                                            |
| wtEGFR + Ki67           | 11 (26)                                         | 5 (12)                                           |
| HER-2 + HER-4           | 5 (12)                                          | 2 (5)                                            |
| HER-2 + EGFRvIII        | 6 (14)                                          | 2 (5)                                            |
| HER-2 + CD44            | 11 (26)                                         | 9 (21)                                           |
| HER-2 + EpCAM           | 10 (23)                                         | 6 (14)                                           |
| HER-2 + Ki67            | 17 (40)                                         | 10 (23)                                          |
| HER-4 + EGFRvIII        | 1 (2)                                           | -                                                |
| HER-4 + CD44            | 4 (9)                                           | 1 (2)                                            |
| HER-4 + EpCAM           | 2 (5)                                           | -                                                |
| HER-4 + Ki67            | 4 (9)                                           | 1 (2)                                            |
| EGFRvIII+ CD44          | 3 (7)                                           | 1 (2)                                            |
| EGFRvIII + EpCAM        | 6 (14)                                          | 1 (2)                                            |
| EGFRvIII + Ki67         | 8 (19)                                          | 2 (5)                                            |
| CD44 + EpCAM            | 6 (14)                                          | -                                                |
| CD44 + Ki67             | 13 (30)                                         | 7 (16)                                           |
| EpCAM + Ki67            | 9 (21)                                          | 2 (5)                                            |
| EGFR + HER-2 + HER-4    | 1 (2)                                           | -                                                |
| EGFR + HER-2 + CD44     | 5 (12)                                          | 2 (5)                                            |
| EGFR + HER-2 + EpCAM    | 4 (9)                                           | 3 (7)                                            |
| EGFR + HER-2 + EGFRvIII | 4 (9)                                           | 2 (5)                                            |
| EGFR + HER-2 + Ki67     | 6 (14)                                          | 3 (7)                                            |
| EGFR + HER-4 + CD44     | 1 (2)                                           | -                                                |
| EGFR + HER-4+ EpCAM     | 1 (2)                                           | -                                                |
| EGFR + HER-4 + EGFRvIII | 1 (2)                                           | -                                                |
| EGFR + HER-4 + Ki67     | 2 (5)                                           | -                                                |
| EGFR + CD44+ EpCAM      | 4 (9)                                           | -                                                |
| EGFR + CD44 + EGFRvIII  | 2 (5)                                           | 1 (2)                                            |
| EGFR + CD44 + Ki67      | 6 (14)                                          | 2 (5)                                            |
| EGFR + EpCAM + EGFRvIII | 3 (7)                                           | 1 (2)                                            |
| EGFR + EpCAM + Ki67     | 4 (9)                                           | 1 (2)                                            |

|                                        |        |       |
|----------------------------------------|--------|-------|
| EGFR + EGFRvIII + Ki67                 | 5 (12) | 1 (2) |
| HER-2 + HER-4 + CD44                   | 4 (9)  | 1 (2) |
| HER-2 + HER-4+ EpCAM                   | 1 (2)  | -     |
| HER-2 + HER-4 + Ki67                   | 4 (9)  | 1 (2) |
| HER-2 + CD44+ EpCAM                    | 4 (9)  | -     |
| HER - 2 + CD44 + EGFRvIII              | 2 (5)  | 1 (2) |
| HER-2 + CD44 + Ki67                    | 9 (21) | 4 (9) |
| HER-2 + EpCAM + EGFRvIII               | 3 (7)  | -     |
| HER-4 + CD44 + EpCAM                   | 1 (2)  | -     |
| HER-4 + EpCAM + EGFRvIII               | 1 (2)  | -     |
| CD44 + EpCAM + EGFRvIII                | 2 (5)  | -     |
| EGFRvIII + EpCAM + Ki67                | 4 (9)  | -     |
| CD44 + Ki67 + EGFRvIII                 | 2 (5)  | -     |
| EGFR + CD44 + EpCAM + EGFRvIII         | 1 (2)  | -     |
| HER-2 + CD44 + EpCAM + EGFRvIII        | 1 (2)  | -     |
| Ki67 + CD44 + EpCAM + EGFRvIII         | 1 (2)  | -     |
| EGFR + HER-2 + CD44 + EpCAM            | 1 (2)  | -     |
| EGFR + Ki67 + CD44 + EpCAM             | 2 (5)  | -     |
| HER-2 + HER-4 + CD44 + EpCAM           | 1 (2)  | -     |
| HER-2 + HER-4 + CD44 +Ki67             | 4 (9)  | -     |
| EGFR + HER-4 + EGFRvIII + CD44 + EpCAM | 1 (2)  | -     |

EGFRvIII, type-III deletion mutant EGFR; EpCAM, epithelial cell adhesion molecule; wt, wild-type.

Table SII. Association between the expression and co-expression of HER family members, CD44, EpCAM and Ki67 and overall survival.

| Biomarker expression  | Overall survival |              |         |
|-----------------------|------------------|--------------|---------|
|                       | Months           | 95% CI       | P-value |
| Individual expression |                  |              |         |
| HER-2                 |                  |              |         |
| Negative              | 43.56±8.36       | 27.17-59.94  |         |
| 1+                    | 66.75±8.99       | 49.16-84.38  | 0.04    |
| HER-4                 |                  |              |         |
| Negative              | 54.77±6.35       | 42.32-67.22  |         |
| >50%                  | 22.00±0.00       | 22.00-22.00  | 0.04    |
| EGFRvIII              |                  |              |         |
| Negative              | 63.66±6.51       | 50.90-76.41  |         |
| 1+                    | 26.36±5.76       | 15.07-37.66  | <0.001  |
| Cytoplasmic           | 28.70±5.82       | 17.29-40.11  | 0.002   |
| Nuclear               | 6.00±0.00        | 6.00-6.00    | 0.002   |
| >5% staining          | 26.50±6.37       | 14.02-38.98  | 0.01    |
| >10% staining         | 21.50±11.30      | 6.00-43.64   | 0.03    |
| >20% staining         | 12.33±9.33       | 6.00-30.63   | <0.01   |
| CD44                  |                  |              |         |
| Negative              | 55.92±7.21       | 41.80-70.05  |         |
| Membranous            | 37.09±8.41       | 20.60-53.58  | 0.03    |
| Cytoplasmic           | 100.20±14.61     | 71.57-128.83 | 0.01    |
| EpCAM                 |                  |              |         |

|                          |             |             |       |
|--------------------------|-------------|-------------|-------|
| Negative                 | 53.52±6.97  | 39.86-67.14 |       |
| Nuclear                  | 25.67±48.59 | 6.74-48.59  | 0.05  |
| >50% staining            | 6.00±0.00   | 6.00-6.00   | 0.002 |
| Co-expression            |             |             |       |
| wtEGFR + EGFRvIII        |             |             |       |
| Negative                 | 59.47±5.94  | 47.84-71.13 |       |
| Positive                 | 21.00±8.90  | 6.55-38.45  | 0.004 |
| EGFRvIII + CD44          |             |             |       |
| Negative                 | 56.65±5.80  | 45.27-68.03 |       |
| Positive                 | 20.33±11.47 | 6.00-42.81  | 0.02  |
| EGFRvIII + EpCAM         |             |             |       |
| Negative                 | 58.12±6.19  | 45.97-70.24 |       |
| Positive                 | 29.50±7.63  | 14.55-44.45 | 0.03  |
| EGFRvIII + Ki67          |             |             |       |
| Negative                 | 60.00±6.25  | 47.94-72.96 |       |
| Positive                 | 27.50±7.94  | 11.95-65.13 | 0.01  |
| wtEGFR + EGFRvIII + Ki67 |             |             |       |
| Negative                 | 58.68±5.84  | 47.24-70.13 |       |
| Positive                 | 19.40±10.73 | 6.00-40.42  | 0.009 |

The association between biomarker expression, at a cut of value of >5% of tumour cells with staining, and overall survival was determined using Kaplan-Meier curves. P<0.05 was considered to indicate a statistically significant difference. EGFRvIII, type-III deletion mutant EGFR; EpCAM, epithelial cell adhesion molecule; wt, wild-type.
